# Supplementary material
Source: publisher site journal article supplement (https://www.dovepress.com/article/369100)
Supplement: Supplementary file 1 [file get_supplementary_file.php]

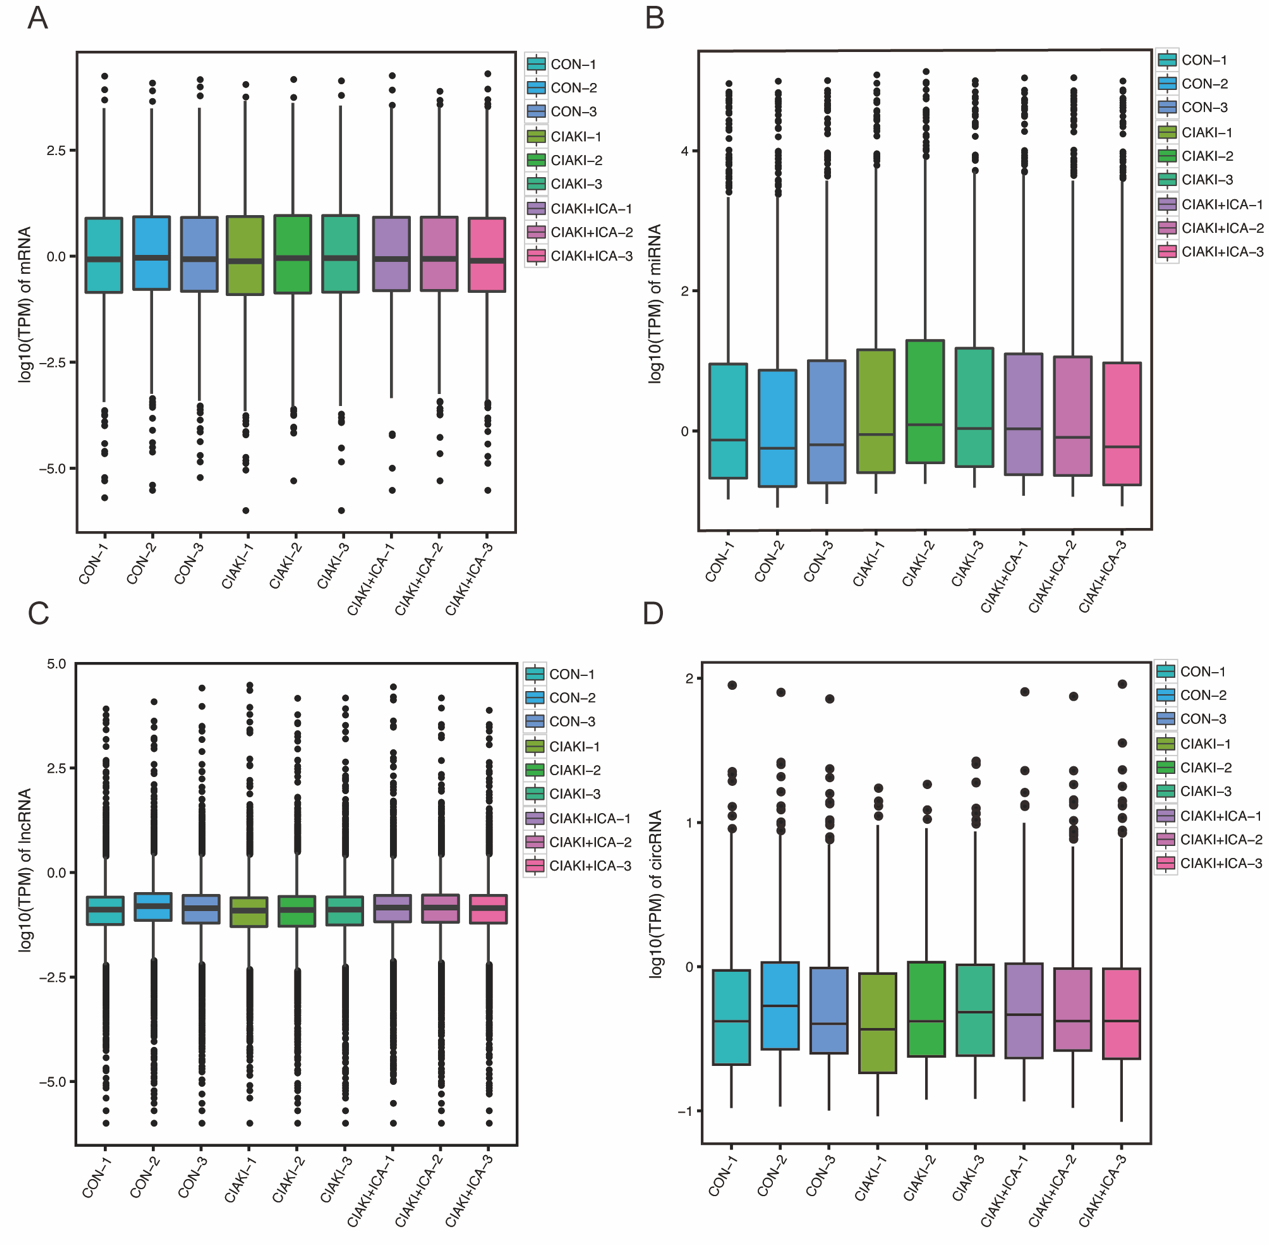


Fig.S1 Overview of gene expressions in 9 rat kidneys. By high throughput sequencing, the expressions of mRNA (A), miRNA (B), lncRNA (C) and circRNA (D) were presented.


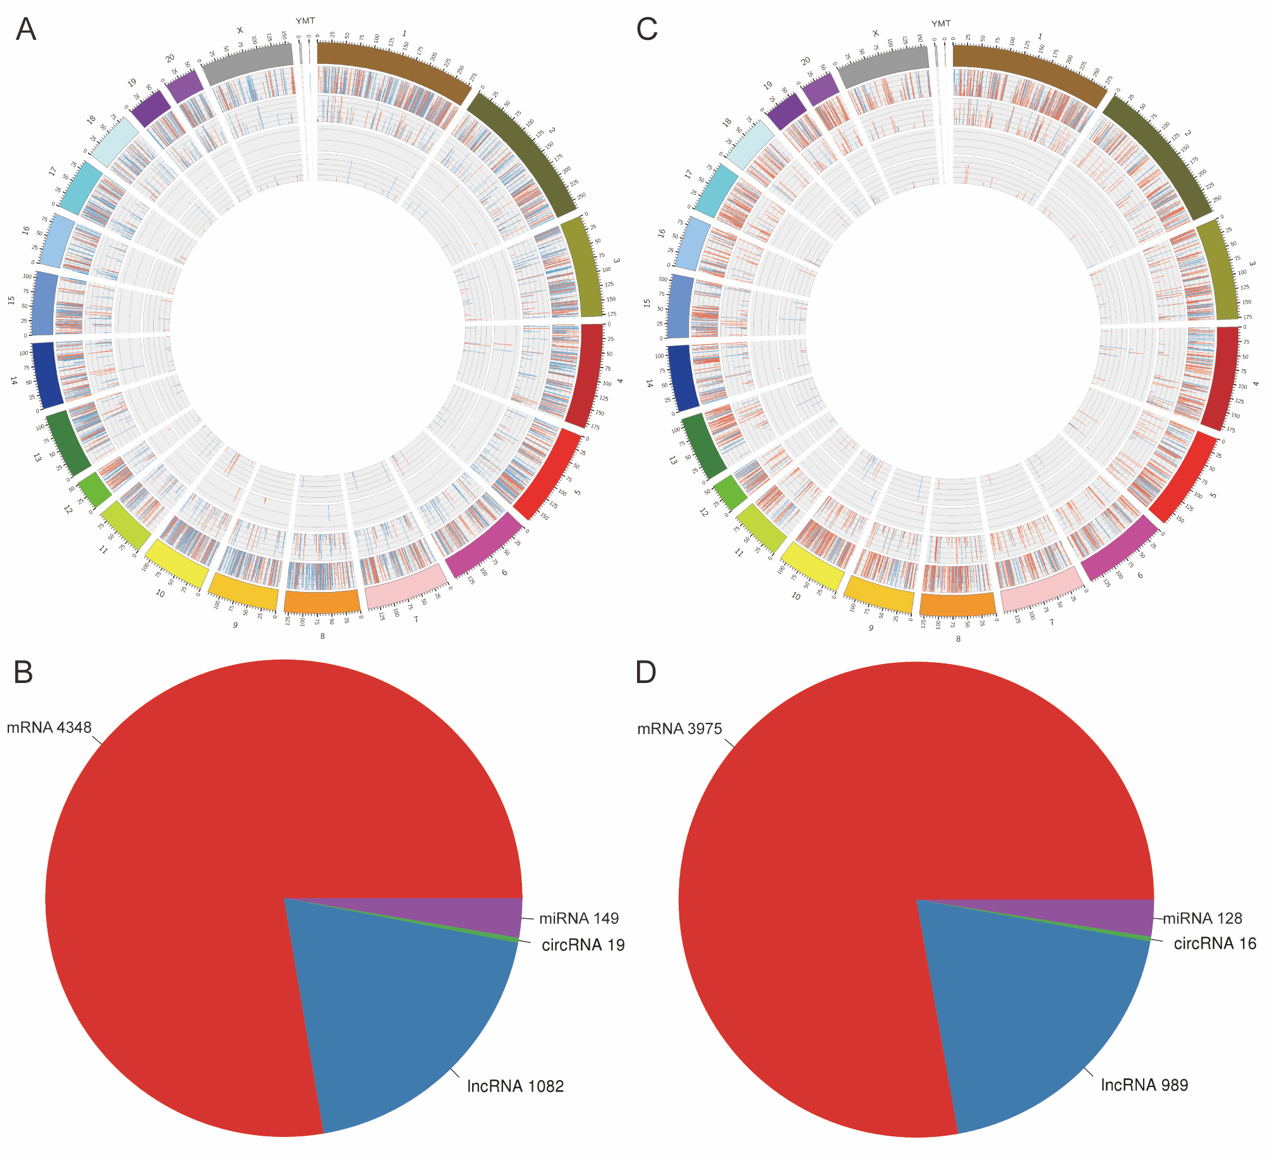


Fig.S2 Overview of DEGs in CIAKI rats, with and without icariin pretreatment. The gene expressions were compared between CIAKI rats and control rats (A, B), as well as CIAKI rats with and without icariin pretreatment (C, D). The circos plots (A, C) demonstrated the distribution of DEGs. From outermost to inner circles, there were information about chromosomal location, expressions of mRNA, lncRNA, circRNA and miRNA. The DEGs were also presented by pie charts (B, D).


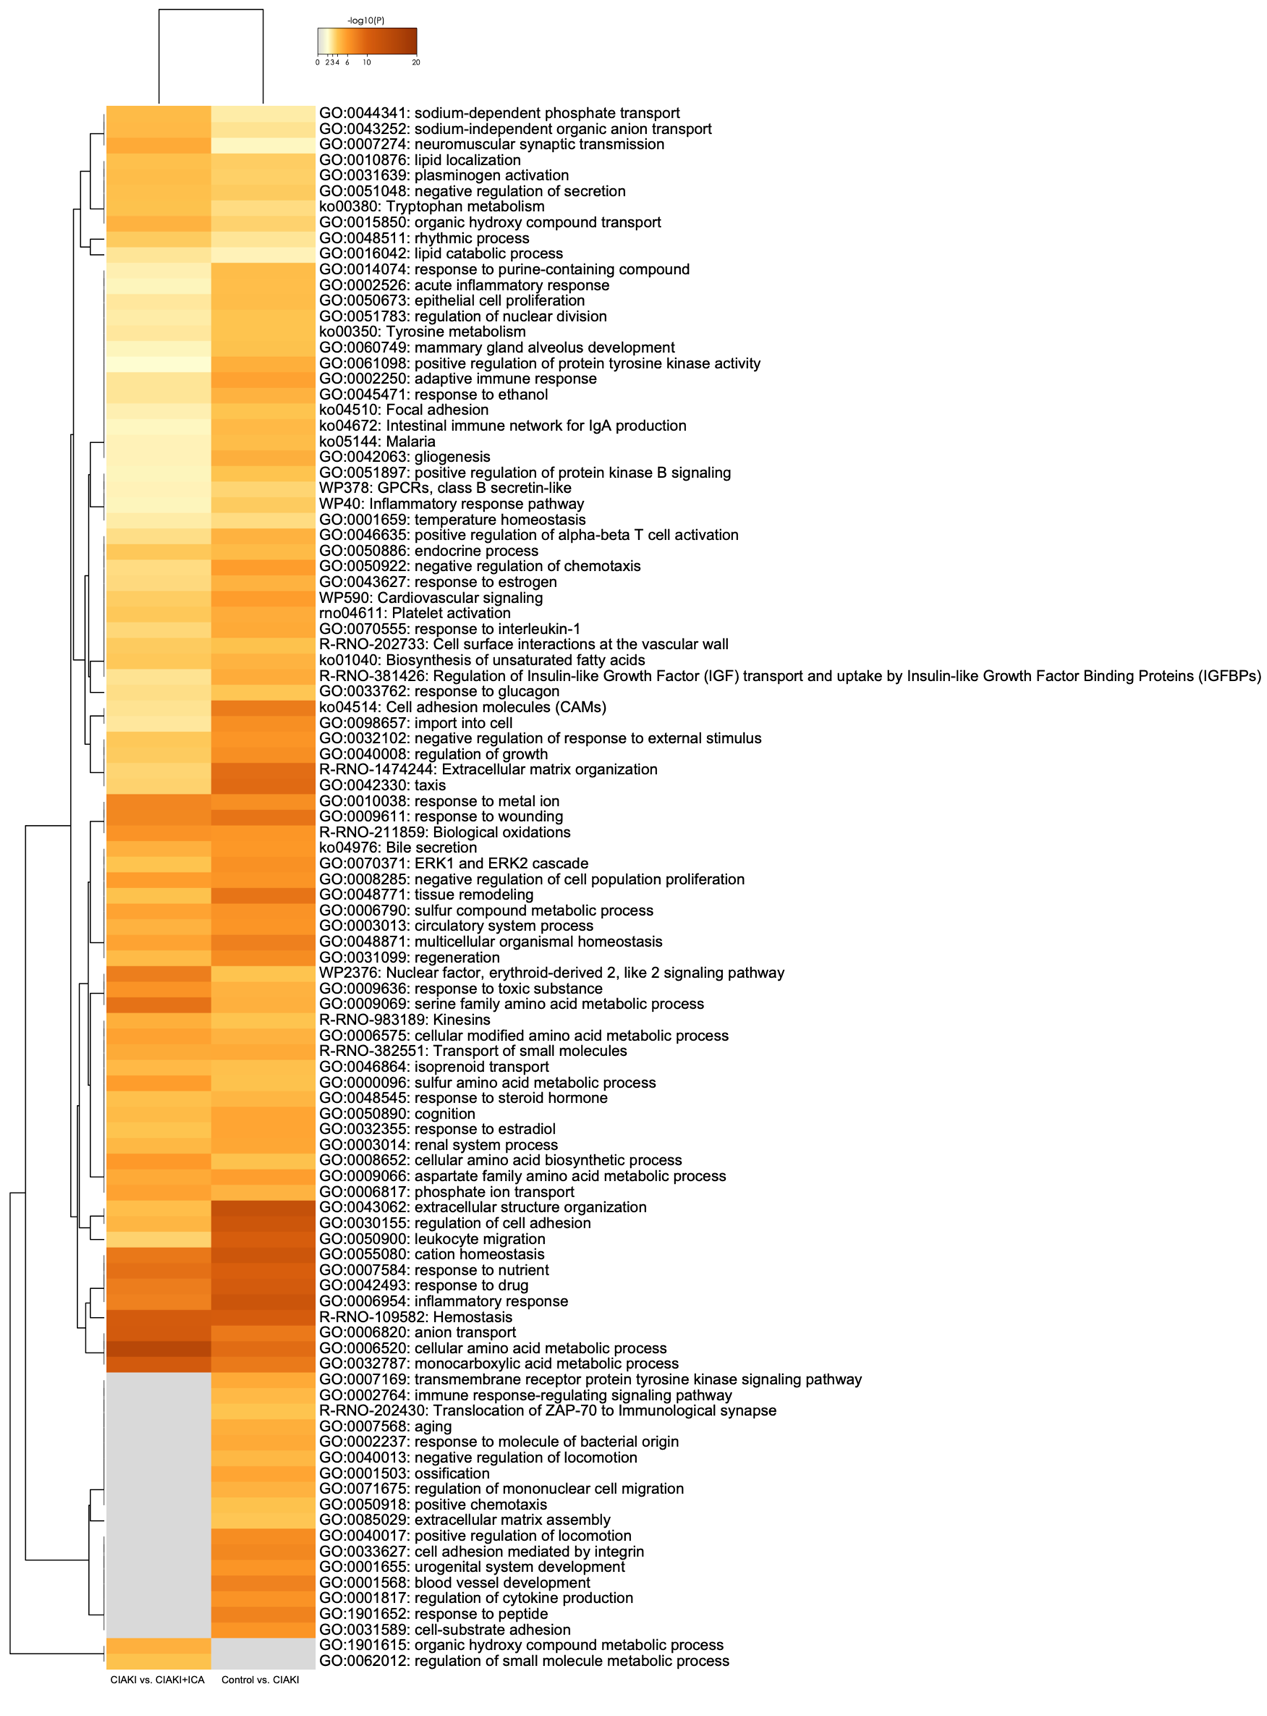


Fig.S3 Top 100 GO terms of DEGs in CIAKI rats, with and without icariin pretreatment. GO terms were clustered and demonstrated by the heatmap. The heatmap cells were colored by their *p* values.


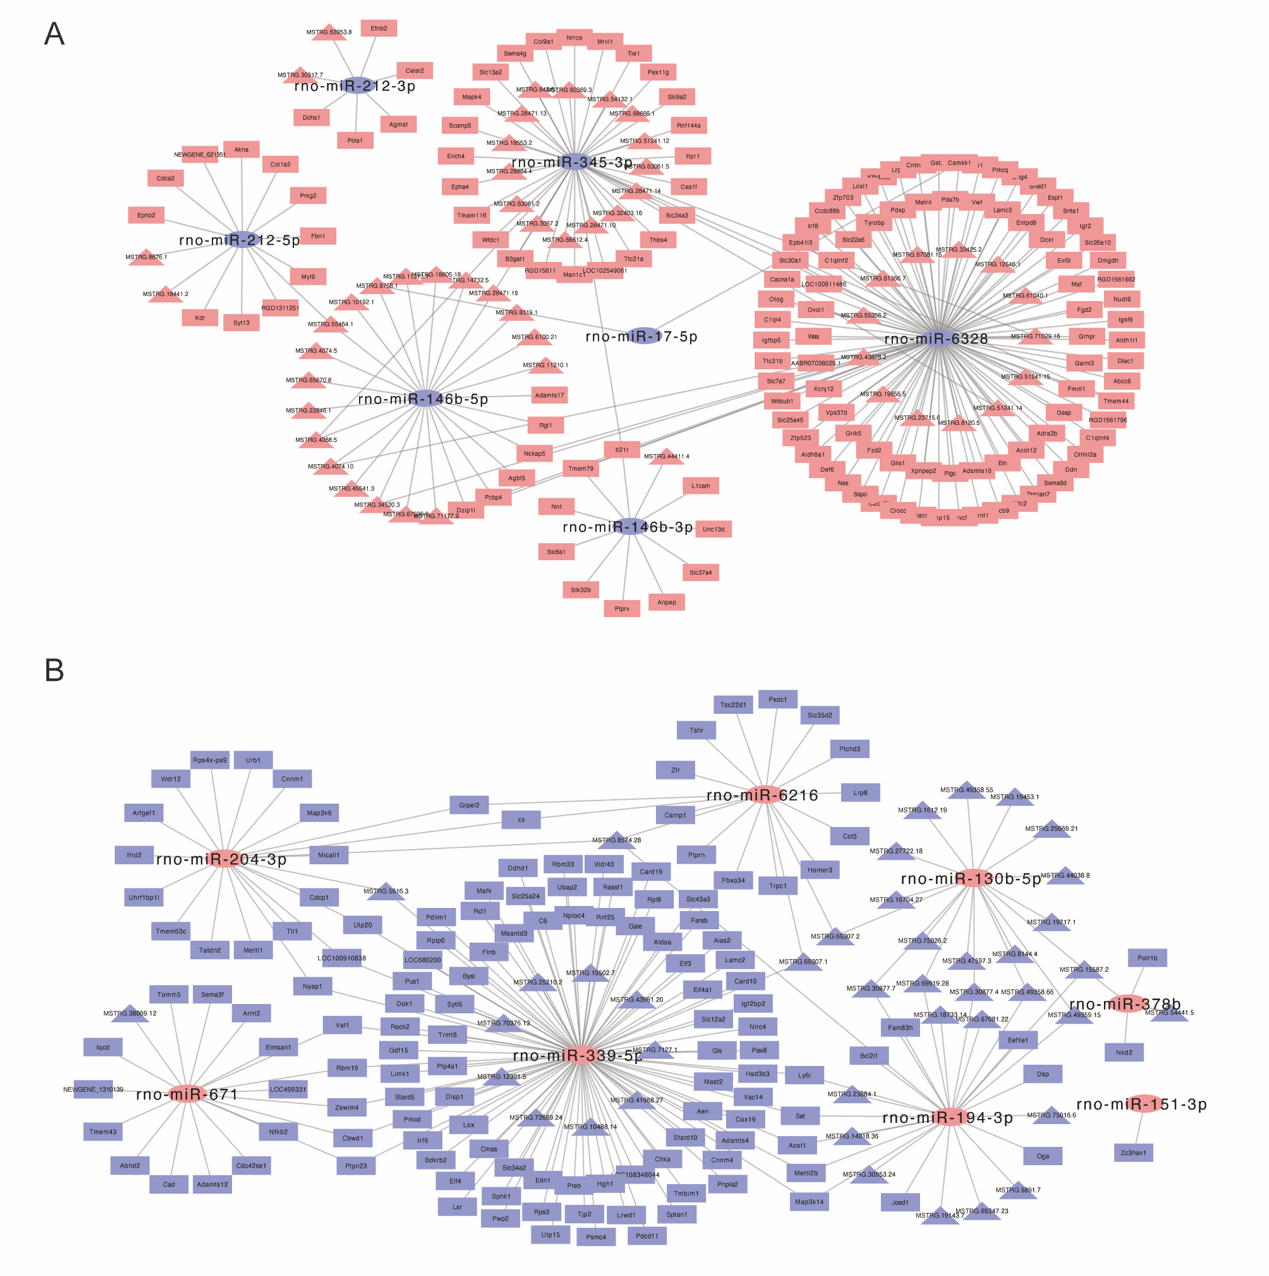


Fig.S4 The lncRNA-associated ceRNA network in icariin pretreated CIAKI rats. The ceRNA network was divided into two parts, one with down-regulated miRNAs (A) in CIAKI+icariin group, and the other with up-regulated miRNAs (B). A triangle stands for a lncRNA, an ellipse stands for a miRNA, and a rectangle stands for an mRNA. The pink color means up regulation in icariin pretreated CIAKI rats, while blue means down regulation.


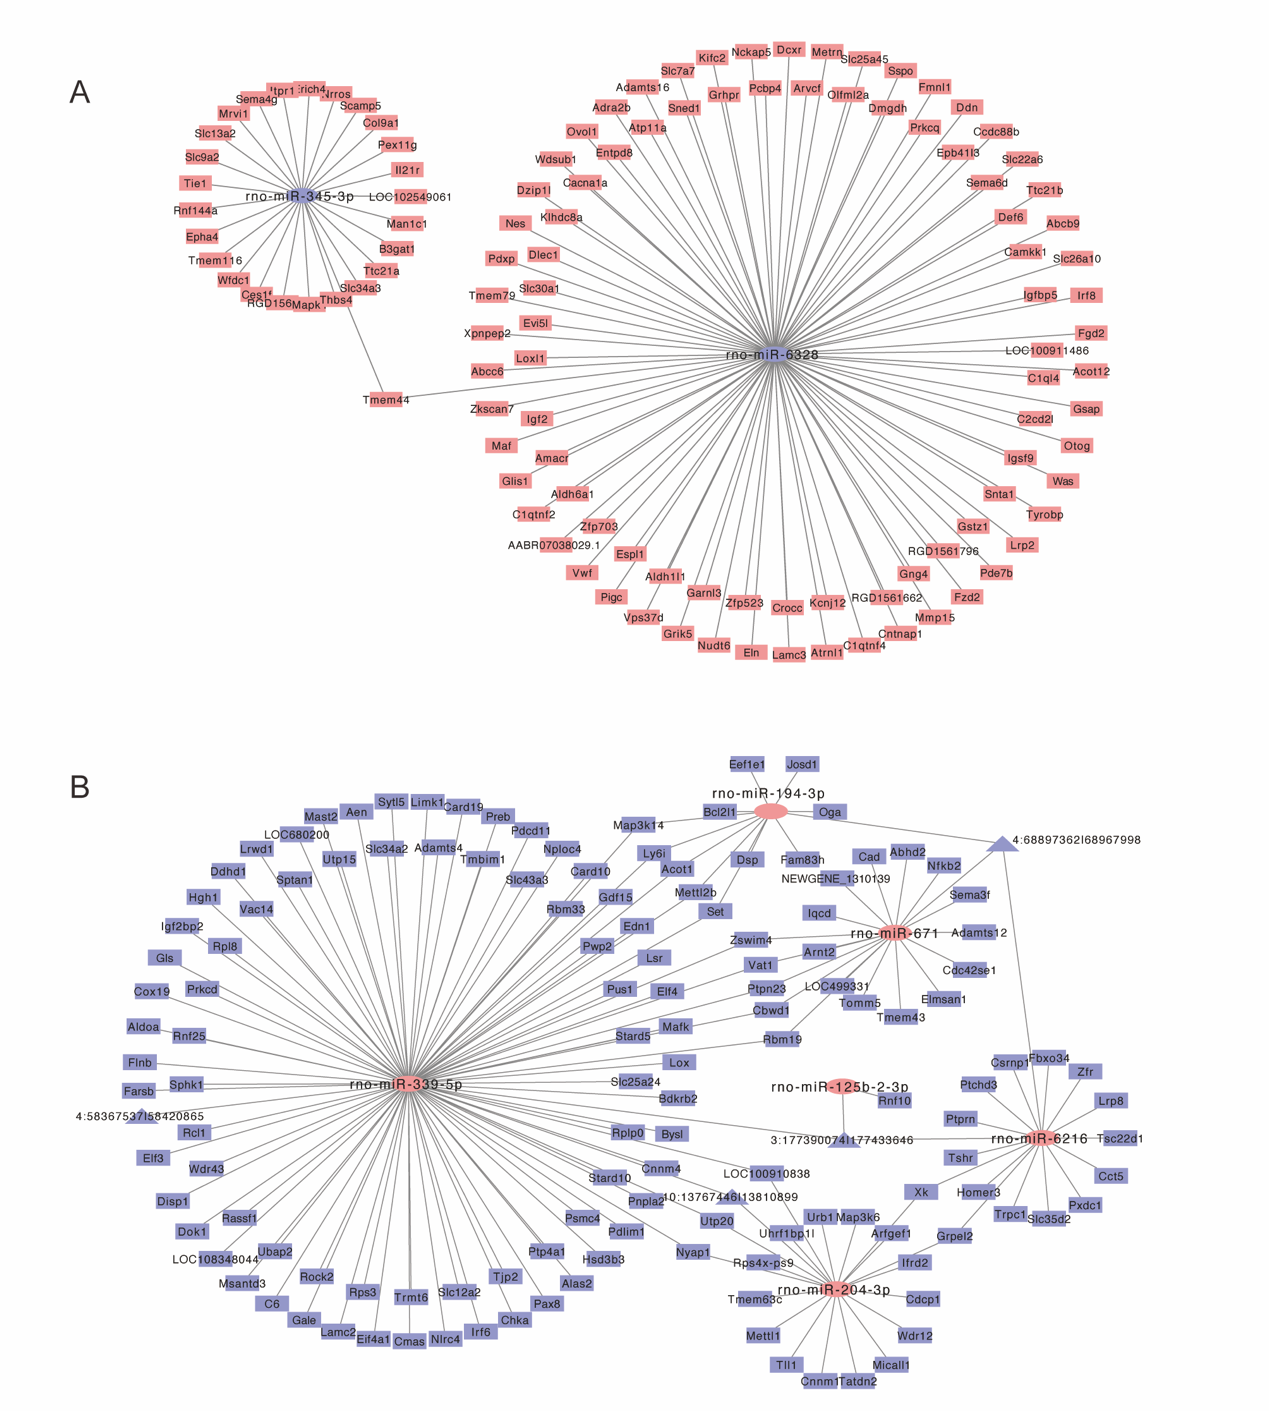


Fig.S5 The circRNA-associated ceRNA network in icariin pretreated CIAKI rats. The ceRNA network was divided into two parts, one with down-regulated miRNAs (A) in CIAKI+icariin group, and the other with up-regulated miRNAs (B). A triangle stands for a circRNA, an ellipse stands for a miRNA, and a rectangle stands for an mRNA. The pink color means up regulation in icariin pretreated CIAKI rats, while blue means down regulation.


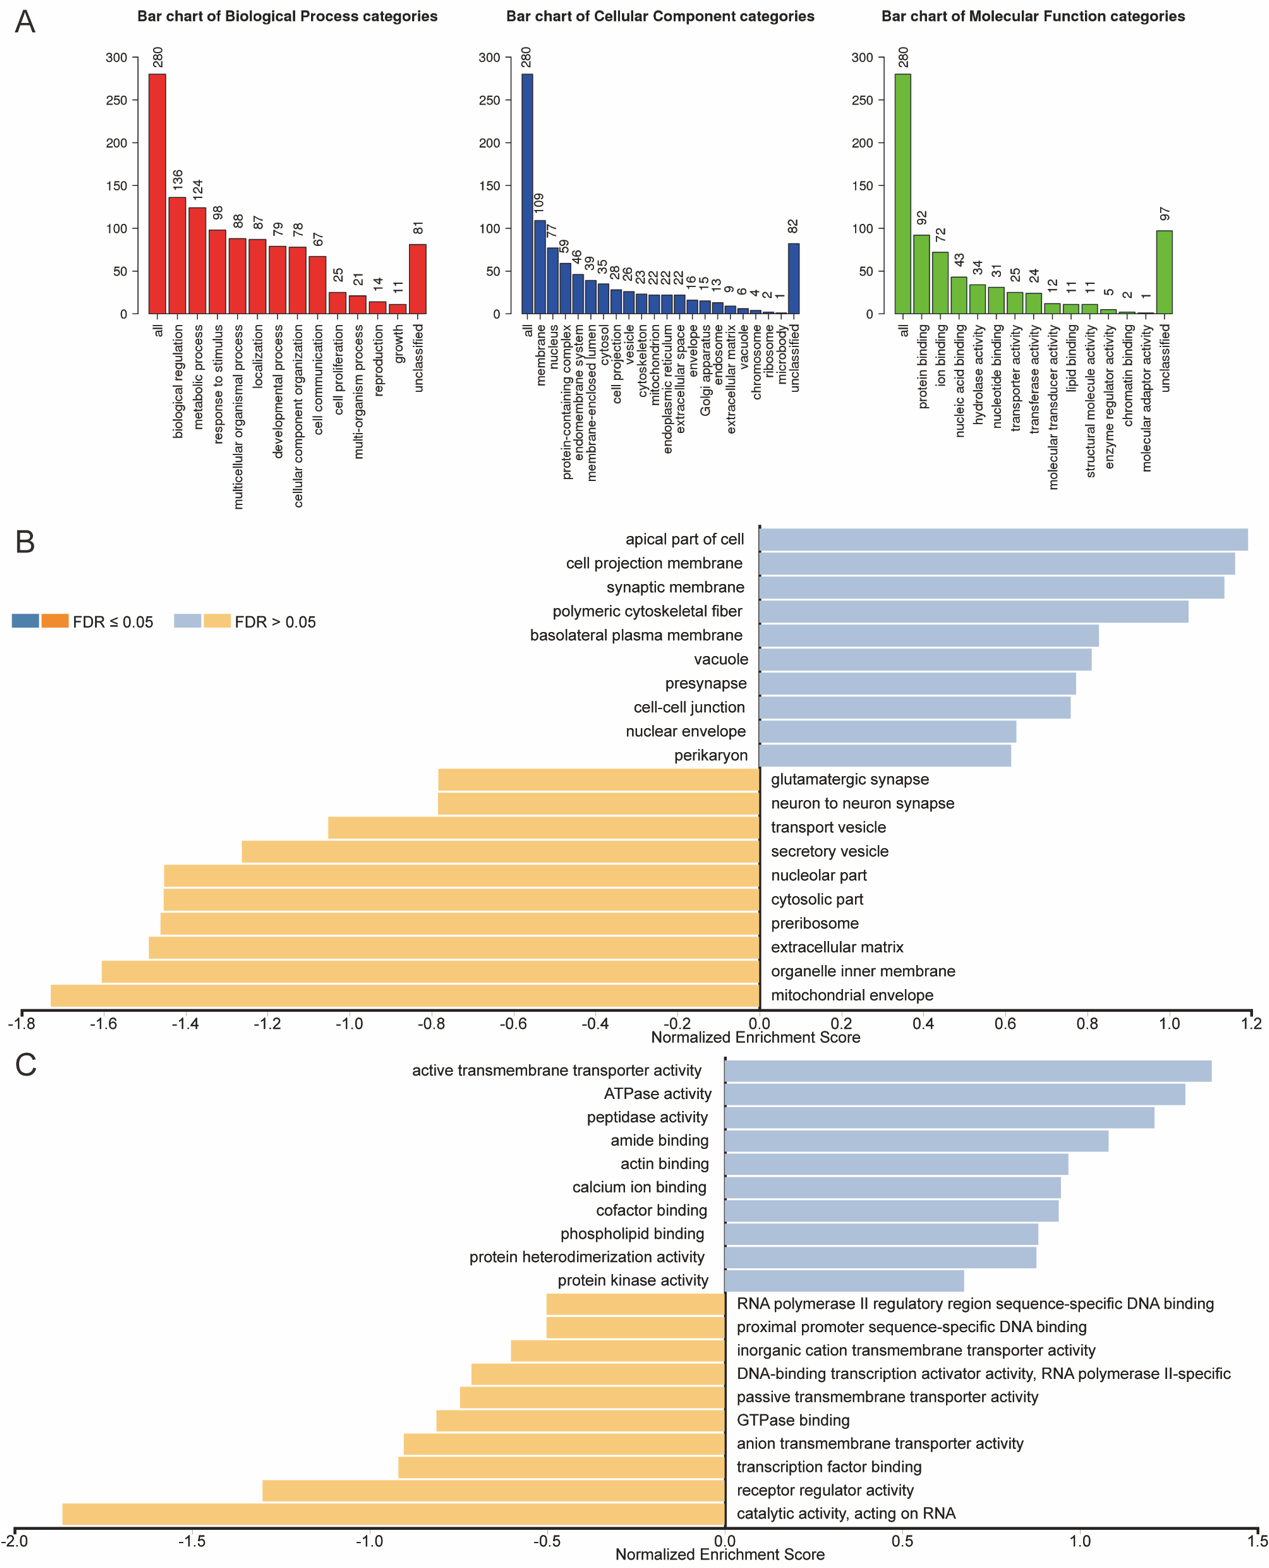


Fig.S6 Function annotation of DEGs in the ceRNA network by WebGestalt. A, a summary of GO terms in three types of categories. The height of each bar represents the number of genes in the category. Specifically, the enriched GO terms in CC (B) and MF (C) categories were exhibited.


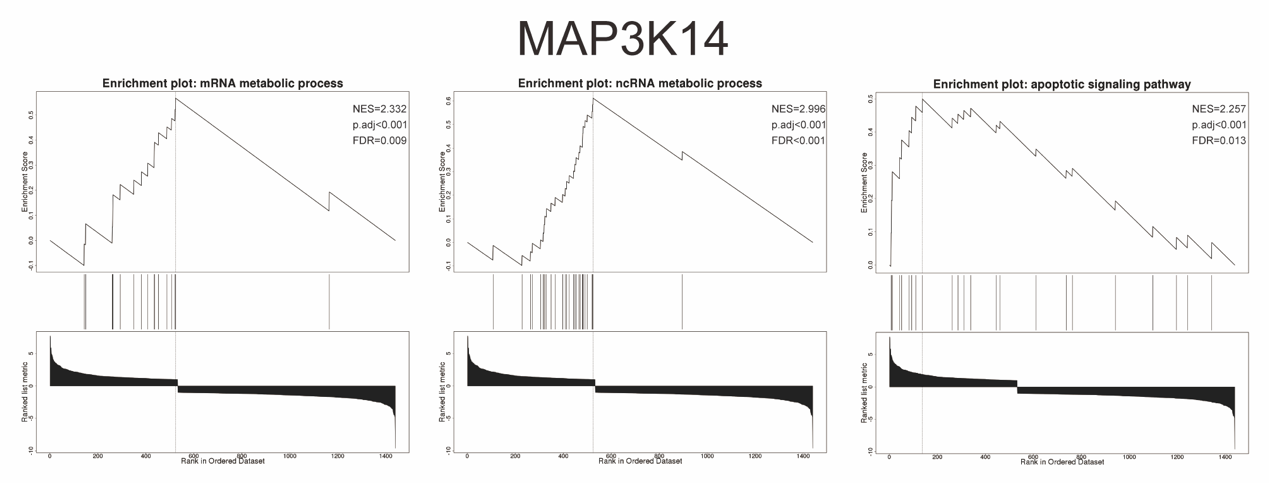


Fig.S7 GSEA analyses of DEGs based on MAP3K14 expression. Based on the median levels of MAP3K14, genes were divided into two groups. The DEGS between two groups were used for GSEA analyses.


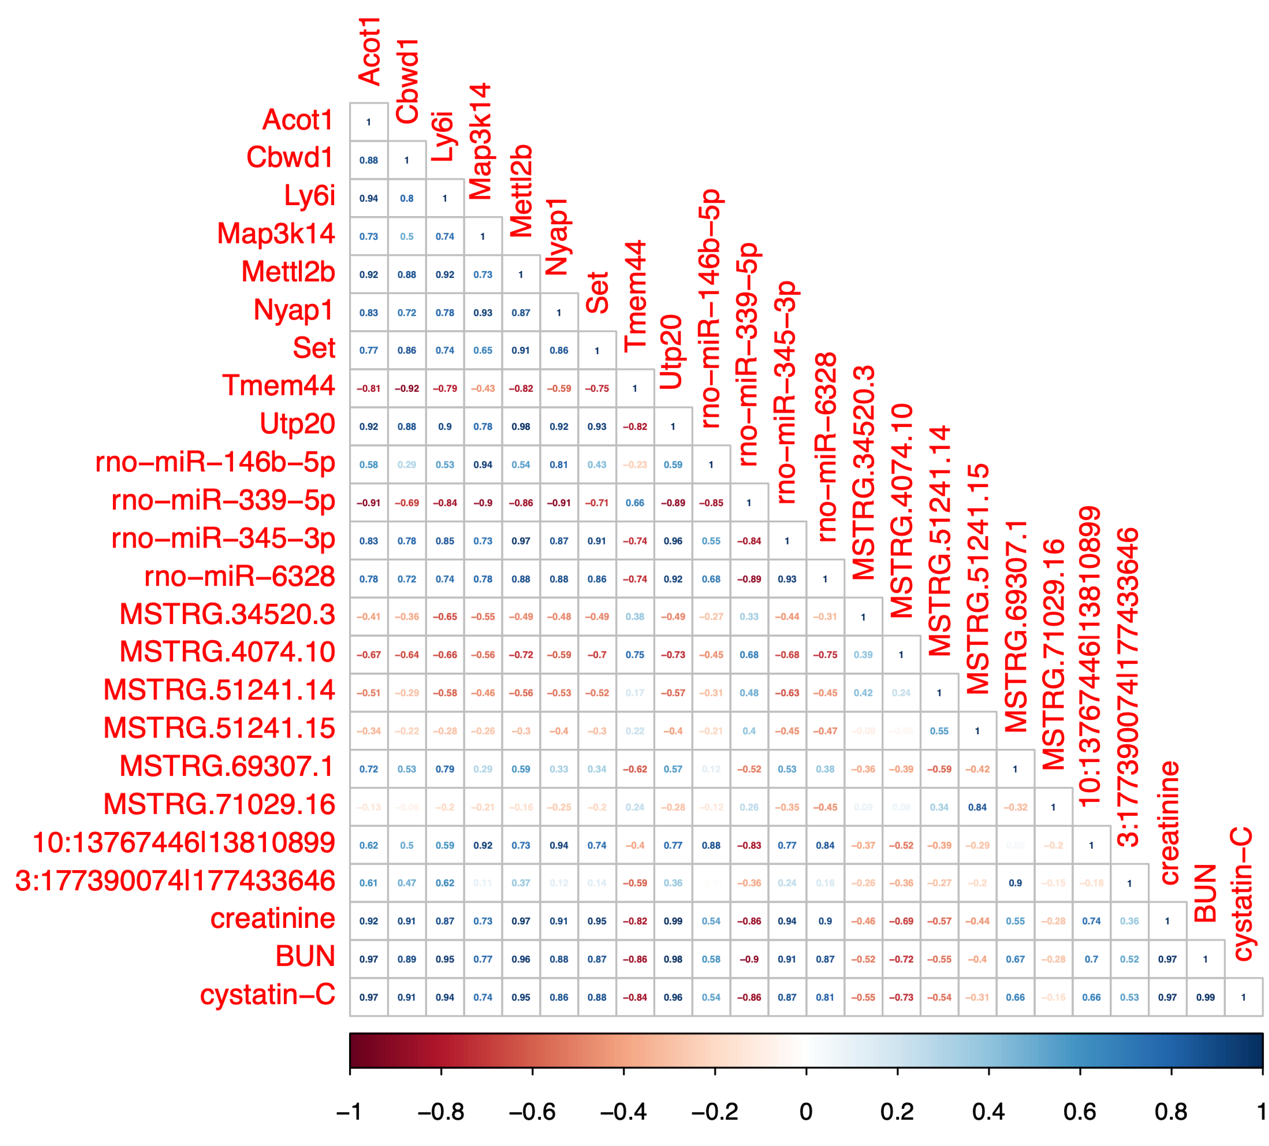


Fig.S8 Correlation analysis of hub genes in the ceRNA network and biomarkers of renal function. The correlation coefficient was in each cell.

Table S1. The sequence of related genes for qPCR

| Gene | Forward (5’-3’) | Reverse (5’-3’) |
| --- | --- | --- |
| Acot1 | GCCTTTCTGGCGCTTGGT | CGCCTCCAACTCCAAAAAGG |
| Cbwd1 | ACCAAGCACCAAGAAAAAGAAGAA | ACCGTTTCTAAGTTCCAGCCA |
| GAPDH | TCATAGACAAGATGGTGAAGGTCGG | ACTTGCCGTGGGTAGAGTCA |
| Ly6i | CCCCTACCCTGATGGAGTCT | TGTTTGAGGACTCTTGGGGC |
| Map3k14 | AAAGGCACAGCCAAGGAAGG | CGCGATGAAAATGCGCTCTG |
| Mettl2 | CCTGGCTCCTCTGCTACCTA | AACAAAGGCAAAACAGCGGG |
| Nyap1 | ACGGTCTCTCAGGATGGGTT | TCTGGGAGCCTGCTTTCCTA |
| Set | CCTGCCTCAGCCCAAGAAA | TGGCGATCAATTCTGACCTCTT |
| Tmem44 | GGCCTACCTAGCAGTTGTCG | GAACTGGGGCTGAAACCTTG |
| Utp20 | AAGCCAAAGCCAGTTTCCCA | AAGCCAAAGCCAGTTTCCCA |
